# Supplementary material for: Ensemble analyses improve signatures of tumour hypoxia and reveal inter-platform differences
Source: Springer Nature journal article supplement (doi:10.1186/1471-2105-15-170), 2014-06-06
Supplement: 12859_2013_6439_MOESM1_ESM.pdf [file 12859_2013_6439_MOESM1_ESM.pdf]

Supplementary Table 1 – Prognostic signature descriptions

Description of each hypoxia prognostic signature used.

| Signature           | Citation | # of genes | Development Description                                                                                                                                                                                                                                                                                                                                                                                                    |
|---------------------|----------|------------|----------------------------------------------------------------------------------------------------------------------------------------------------------------------------------------------------------------------------------------------------------------------------------------------------------------------------------------------------------------------------------------------------------------------------|
| Buffa metagene      | [9]      | 51         | Omnibus searched for gene expression studies/data sets in cancer, 8 were selected, Winter et al. Was used as a training data set<br>Tissue: frozen material extracted before chemotherapy, radiotherapy or adjuvant treatment<br>Microarray: Affymetrix U133A, B and plus2<br>Normalization: GCRMA                                                                                                                         |
| Chi                 | [10]     | 145        | Cell lines (4): Human coronary artery endothelial cells, smooth muscle cells, human mammalian epithelial cells, and renal proximal tubule epithelial cells<br>Hypoxic conditions: 2% and 0.02% oxygen<br>Microarray: human cDNA microarrays containing 42,000 elements representing 27,291 unique genes, scanned with Axon Scanner 4000<br>Normalization: normalized to the ambient air control harvested at the same time |
| Elvidge             | [11]     | 178        | Cell lines: MCF7 breast cancer and Hep3B hepatoblastoma<br>Hypoxic conditions: 1% oxygen<br>Microarray: HG-U133A GeneChips, HG-U133 plus 2 GeneChips<br>Normalization: GCRMA                                                                                                                                                                                                                                               |
| Hu                  | [12]     | 13         | Tissue: breast tumor<br>Microarray: Agilent Human oligonucleotide microarrays scanned on an Axon GenePix 4000B<br>Normalization: Lowess                                                                                                                                                                                                                                                                                    |
| Seigneuric 0% early | [13]     | 68         | Used Data from Chi et al.<br>Cell lines (4): Human coronary artery endothelial cells, smooth muscle cells, human mammalian epithelial cells, and renal proximal tubule epithelial cells<br>Hypoxic conditions: 0.02% oxygen<br>Microarray: Affymetrix Human Genome U133A Array, Affymetrix Human Genome U133B Array<br>Normalization:                                                                                      |
| Seigneuric 2% early | [13]     | 34         | Used Data from Chi et al.<br>Cell lines (4): Human coronary artery endothelial cells, smooth muscle cells, human mammalian                                                                                                                                                                                                                                                                                                 |

|                 |      |     |                                                                                                                                                                                                                   |
|-----------------|------|-----|-------------------------------------------------------------------------------------------------------------------------------------------------------------------------------------------------------------------|
|                 |      |     | epithelial cells, and renal proximal tubule epithelial cells<br>Hypoxic conditions: 2% oxygen<br>Microarray: Affymetrix Human Genome U133A Array, Affymetrix Human Genome U133B Array<br>Normalization:           |
| Sorensen        | [14] | 28  | Cell line: human uterine cervix squamous cell carcinoma<br>Hypoxic conditions: 5%, 1%, 0.1%, 0.01% and 0% oxygen,<br>Microarray: Human Genome U133 Plus 2.0 Array<br>Normalization: MAS 5.0                       |
| Winter metagene | [15] | 101 | Tissue: untreated head and neck squamous cell carcinomas from surgery<br>Microarray: Affymetrix U133plus2 GeneChips<br>Normalization: GCRMA                                                                       |
| Cluster 1       | [16] | 69  | Cell culture: Exponentially growing prostate (DU145), colon (HT29) and breast (MCF7) carcinoma cell<br>Hypoxic conditions: 0.0% oxygen<br>Microarray: Affymetrix HG-U133 Plus 2.0 GeneChips<br>Normalization: RMA |
| Cluster 2       | [16] | 246 | Cell culture: Exponentially growing prostate (DU145), colon (HT29) and breast (MCF7) carcinoma cell<br>Hypoxic conditions: 0.0% oxygen<br>Microarray: Affymetrix HG-U133 Plus 2.0 GeneChips<br>Normalization: RMA |
| Cluster 3       | [16] | 157 | Cell culture: Exponentially growing prostate (DU145), colon (HT29) and breast (MCF7) carcinoma cell<br>Hypoxic conditions: 0.0% oxygen<br>Microarray: Affymetrix HG-U133 Plus 2.0 GeneChips<br>Normalization: RMA |
| Cluster 4       | [16] | 95  | Cell culture: Exponentially growing prostate (DU145), colon (HT29) and breast (MCF7) carcinoma cell<br>Hypoxic conditions: 0.0% oxygen<br>Microarray: Affymetrix HG-U133 Plus 2.0 GeneChips<br>Normalization: RMA |
| Cluster 5       | [16] | 162 | Cell culture: Exponentially growing prostate (DU145), colon (HT29) and breast (MCF7) carcinoma cell                                                                                                               |

|           |      |    |                                                                                                                                                                                                                                |
|-----------|------|----|--------------------------------------------------------------------------------------------------------------------------------------------------------------------------------------------------------------------------------|
|           |      |    | <p>Hypoxic conditions: 0.0% oxygen<br/> Microarray: Affymetrix HG-U133 Plus 2.0 GeneChips<br/> Normalization: RMA</p>                                                                                                          |
| Cluster 6 | [16] | 14 | <p>Cell culture: Exponentially growing prostate (DU145), colon (HT29) and breast (MCF7) carcinoma cell<br/> Hypoxic conditions: 0.0% oxygen<br/> Microarray: Affymetrix HG-U133 Plus 2.0 GeneChips<br/> Normalization: RMA</p> |
| Cluster 7 | [16] | 28 | <p>Cell culture: Exponentially growing prostate (DU145), colon (HT29) and breast (MCF7) carcinoma cell<br/> Hypoxic conditions: 0.0% oxygen<br/> Microarray: Affymetrix HG-U133 Plus 2.0 GeneChips<br/> Normalization: RMA</p> |
