# Supplementary material for: Ensemble analyses improve signatures of tumour hypoxia and reveal inter-platform differences
Source: Springer Nature journal article supplement (doi:10.1186/1471-2105-15-170), 2014-06-06
Supplement: 12859_2013_6439_MOESM2_ESM.pdf [file 12859_2013_6439_MOESM2_ESM.pdf]

Supplementary Table 2 - Gene counts per prognostic signature

The number of genes with data in each annotation and platform for the signatures.

| Signature           | # of genes | Default Annotation |               | Alternative Annotation |               |
|---------------------|------------|--------------------|---------------|------------------------|---------------|
|                     |            | U133A              | U133 Plus 2.0 | U133A                  | U133 Plus 2.0 |
| Buffa metagene      | <b>51</b>  | 42                 | 46            | 44                     | 48            |
| Chi                 | <b>145</b> | 113                | 129           | 118                    | 137           |
| Elvidge             | <b>178</b> | 167                | 170           | 169                    | 170           |
| Hu                  | <b>13</b>  | 12                 | 12            | 12                     | 12            |
| Seigneuric 0% early | <b>68</b>  | 54                 | 67            | 52                     | 65            |
| Seigneuric 0% early | <b>34</b>  | 28                 | 30            | 27                     | 31            |
| Sorensen            | <b>28</b>  | 19                 | 22            | 21                     | 27            |
| Winter metagene     | <b>101</b> | 79                 | 90            | 77                     | 92            |
| Cluster 1           | <b>69</b>  | 48                 | 60            | 52                     | 68            |
| Cluster 2           | <b>246</b> | 205                | 231           | 211                    | 246           |
| Cluster 3           | <b>157</b> | 114                | 144           | 115                    | 155           |
| Cluster 4           | <b>95</b>  | 61                 | 86            | 64                     | 92            |
| Cluster 5           | <b>162</b> | 119                | 142           | 123                    | 159           |
| Cluster 6           | <b>14</b>  | 8                  | 11            | 10                     | 14            |
| Cluster 7           | <b>28</b>  | 19                 | 25            | 15                     | 26            |
