# Supplementary material for: Ensemble analyses improve signatures of tumour hypoxia and reveal inter-platform differences
Source: Springer Nature journal article supplement (doi:10.1186/1471-2105-15-170), 2014-06-06

# Signatures

- Winter Metagene ●
- Bufa Metagene ●
- Hu ●
- cluster 6 ●
- cluster 7 ●
- Chi ●
- Sorensen ●
- Elvidge ●
- Seigneuric 2% early ●
- cluster 1 ●
- cluster 5 ●
- cluster 4 ●
- Seigneuric 0% early ●
- cluster 2 ●
- cluster 3 ●
- ensemble △
- single preprocessing ○

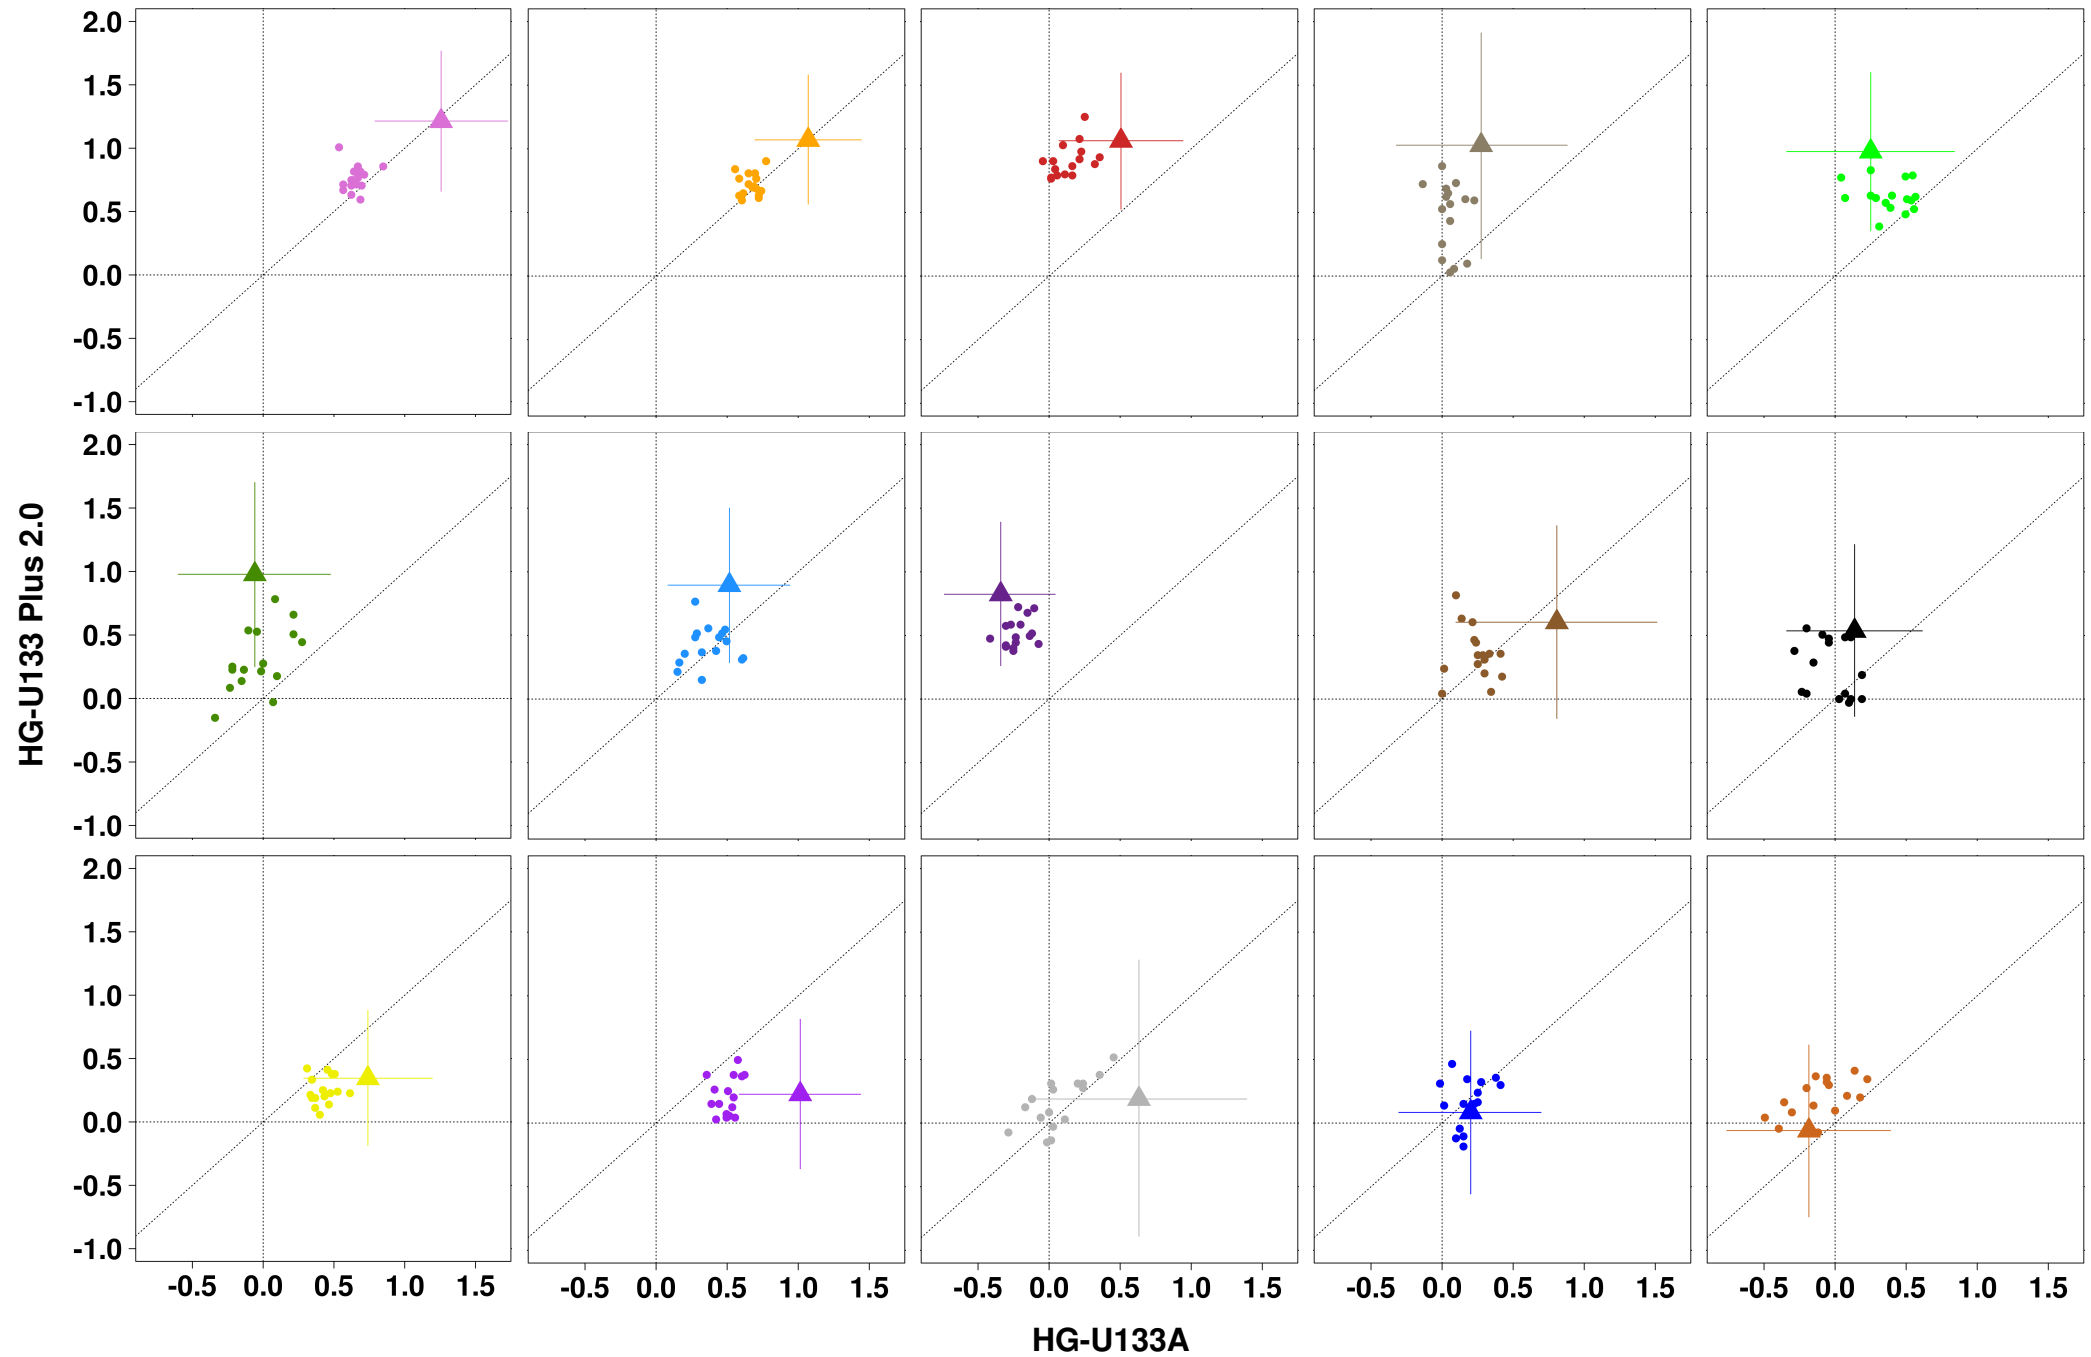

Supplement: 12859_2013_6439_MOESM4_ESM.pdf [file 12859_2013_6439_MOESM4_ESM.pdf]
