# Supplementary material for: Ensemble analyses improve signatures of tumour hypoxia and reveal inter-platform differences
Source: Springer Nature journal article supplement (doi:10.1186/1471-2105-15-170), 2014-06-06

HG-U133A

HG-U133 Plus 2.0

**A**

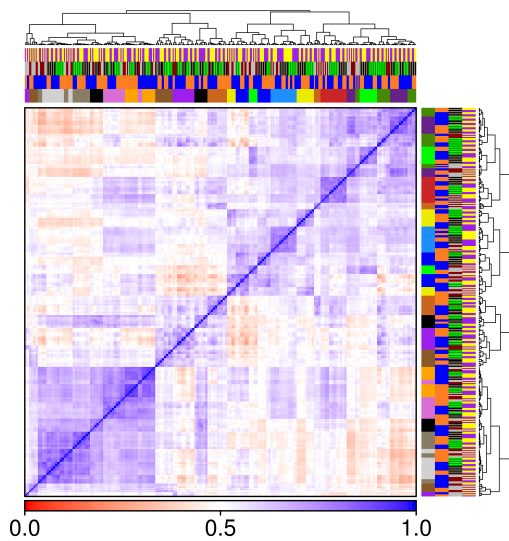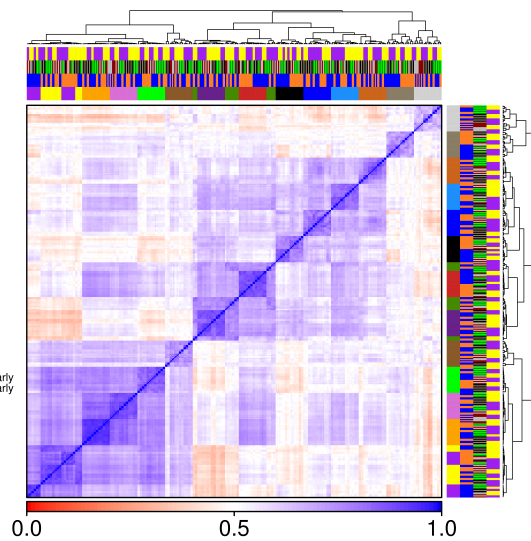

**B**

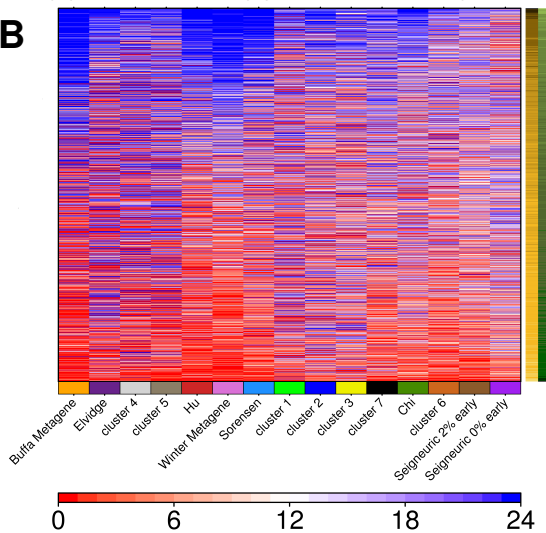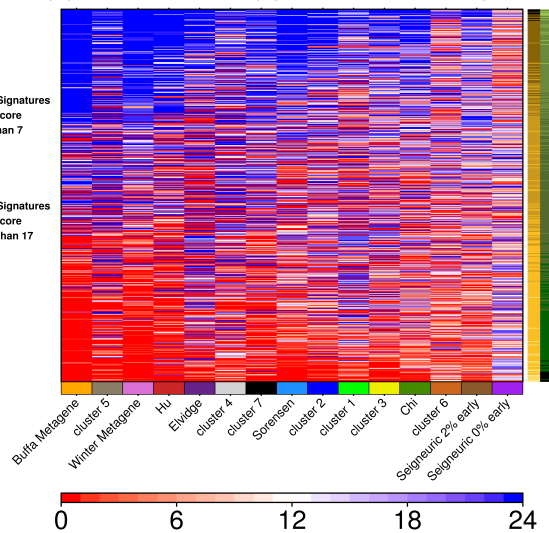

Supplement: 12859_2013_6439_MOESM7_ESM.pdf [file 12859_2013_6439_MOESM7_ESM.pdf]
