# Supplementary material for: Ensemble analyses improve signatures of tumour hypoxia and reveal inter-platform differences
Source: Springer Nature journal article supplement (doi:10.1186/1471-2105-15-170), 2014-06-06

## A. Percent Agreement of Classifications for Winter Metagene

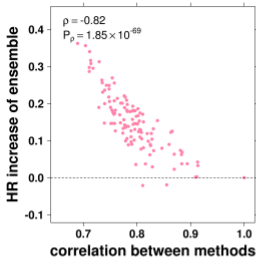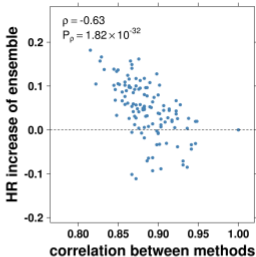

## B. Spearman's Correlation Between Gene Univariate Analyses

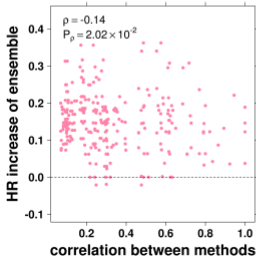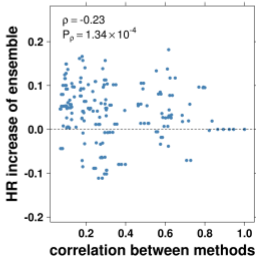

Supplement: 12859_2013_6439_MOESM11_ESM.pdf [file 12859_2013_6439_MOESM11_ESM.pdf]
