# Supplementary material for: Ensemble analyses improve signatures of tumour hypoxia and reveal inter-platform differences
Source: Springer Nature journal article supplement (doi:10.1186/1471-2105-15-170), 2014-06-06

HG-U133A

Separate MAS5 with  
default annotation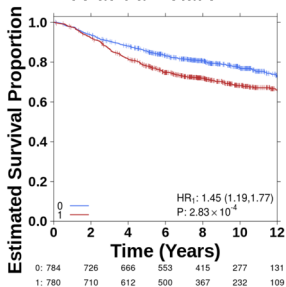Merged GCRMA with  
alternative annotation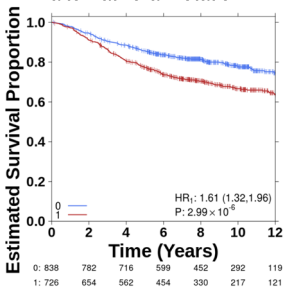

Ensemble

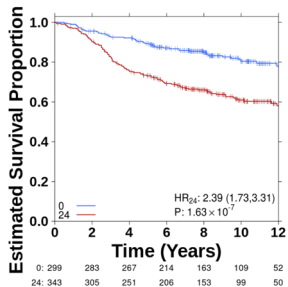

HG-U133 Plus 2.0

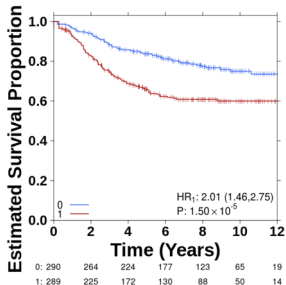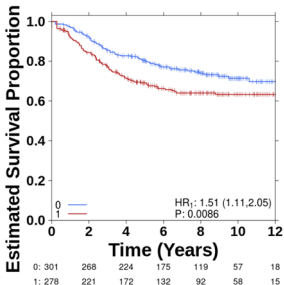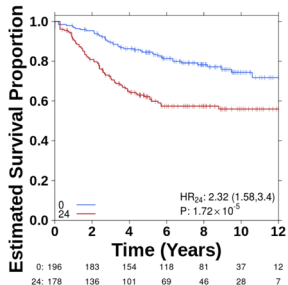

Supplement: 12859_2013_6439_MOESM15_ESM.pdf [file 12859_2013_6439_MOESM15_ESM.pdf]
